# Supplementary material
Source: PubMed Central journal article supplement (PMC3421998)
Supplement: MCB.00526-12_zmb999109625so1.pdf [file MCB.00526-12_zmb999109625so1.pdf]

## Table S1

### Pearson correlation

|        | eWAT | iWAT  | BAT  |
|--------|------|-------|------|
| iWAT   | 0.60 |       |      |
| BAT    | 0.47 | 0.48  |      |
| 3T3-L1 | 0.25 | -0.05 | 0.02 |

### Spearman correlation

|        | eWAT | iWAT | BAT  |
|--------|------|------|------|
| iWAT   | 0.62 |      |      |
| BAT    | 0.53 | 0.55 |      |
| 3T3-L1 | 0.33 | 0.05 | 0.13 |

### Table S1. Pearson and Spearman correlation

Pearson and Spearman correlation coefficients of the log2 transformed normalized tag counts for binding sites from eWAT-, iWAT-, and BAT-derived adipocytes, as well as 3T3-L1 adipocytes.

**Table S2**

| GO term (Wiki)    | p-value (BAT) | p-value (eWAT) |
|-------------------|---------------|----------------|
| Squamous cell     | 1.41E-5       | 0.0017         |
| Muscle cell       | 0.00073       | 5.96E-10       |
| Adipocyte         | 0.0044        | 0.0125         |
| Epithelium        | 0.0063        | 1.45E-5        |
| Signaling by EGFR | 0.007         | 0.0091         |
| Lymphocyte        | 0.0078        | 2.09E-5        |

  

| GO term (KEGG)                     | p-value (BAT) | p-value (eWAT) |
|------------------------------------|---------------|----------------|
| ECM-receptor interaction           | 3.39E-5       | 6.99E-27       |
| PPAR signaling pathway             | 0.0004        | 0.0077         |
| Pantothenate and CoA biosynthesis  | 0.0007        | 0.0029         |
| Endocytosis                        | 0.0013        | 0.0058         |
| Insulin signaling pathway          | 0.011         | 4.05E-05       |
| Vascular smooth muscle contraction | 0.013         | 0.0108         |
| Focal adhesion                     | 0.014         | 7.34E-07       |
| Citrate cycle (TCA cycle)          | 0.014         | 0.0058         |
| Adipocytokine signaling pathway    | 0.015         | 9.55E-05       |
| Glioma                             | 0.017         | 0.0009         |

**Table S2. Functional enrichment analysis**

PPAR $\gamma$  sites enriched in eWAT- or BAT-derived adipocytes were assigned to the nearest gene (within 50kb), and the resulting target gene lists were used for functional enrichment analysis using WikiPathways, and KEGG pathways databases. Significantly enriched pathways ( $p < 0.02$ ) that are shared between eWAT- and BAT-derived adipocytes are shown in the table. Abbreviations: EGFR= Epidermal growth factor receptor, ECM=Extracellular matrix, PPAR=Peroxisome proliferator-activated receptor, TCA=Tricarboxylic acid cycle

**Figure S1**

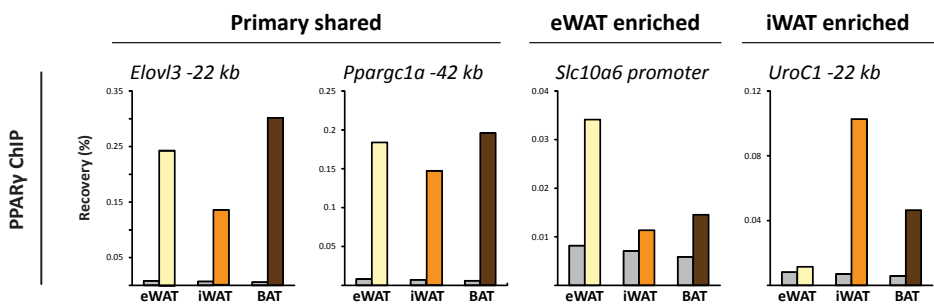

**Figure S1. Validation of PPAR $\gamma$  peaks shown in Figure 3**

Validation of PPAR $\gamma$  binding by ChIP-qPCR for sites detected in ChIP-seq as shared between eWAT-, iWAT-, and BAT-derived adipocytes (*Elovl3* (-22 kb) and *PGC-1 $\alpha$*  (-42 kb)), a site enriched in eWAT-derived adipocytes (*Slc10a6* promoter) and a site enriched in iWAT-derived adipocytes (*UroC1* (-22kb)). PPAR $\gamma$  binding sites enriched in BAT-derived adipocytes are validated in Fig. 5. Data are representative of at least two independent experiments.

**Figure S2**

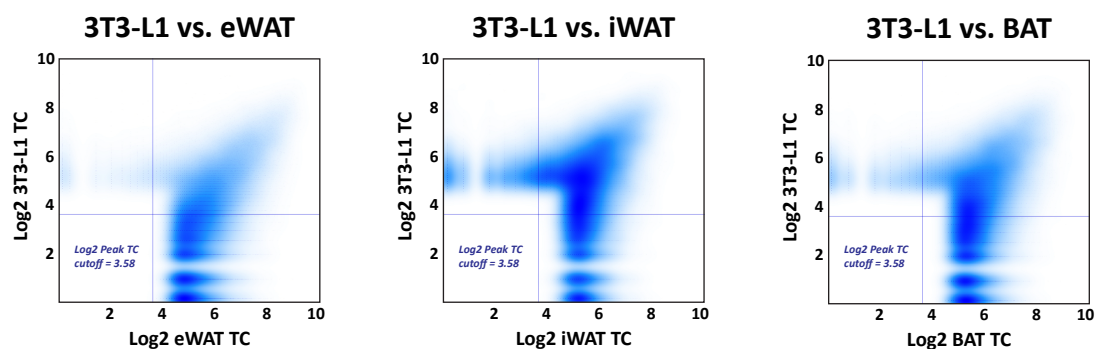

**Figure S2. Correlation between PPAR $\gamma$  binding intensities in eWAT-, iWAT-, and BAT-derived adipocytes and 3T3-L1 adipocytes**

Density plots showing correlation between log<sub>2</sub> transformed normalized tag counts for PPAR $\gamma$  binding in eWAT-, iWAT-, and BAT-derived adipocytes and 3T3-L1 adipocytes. Horizontal and vertical lines indicate log<sub>2</sub> normalized tag count cutoff for binding sites at 3.58 (corresponding to 12 tags).

Figure S3

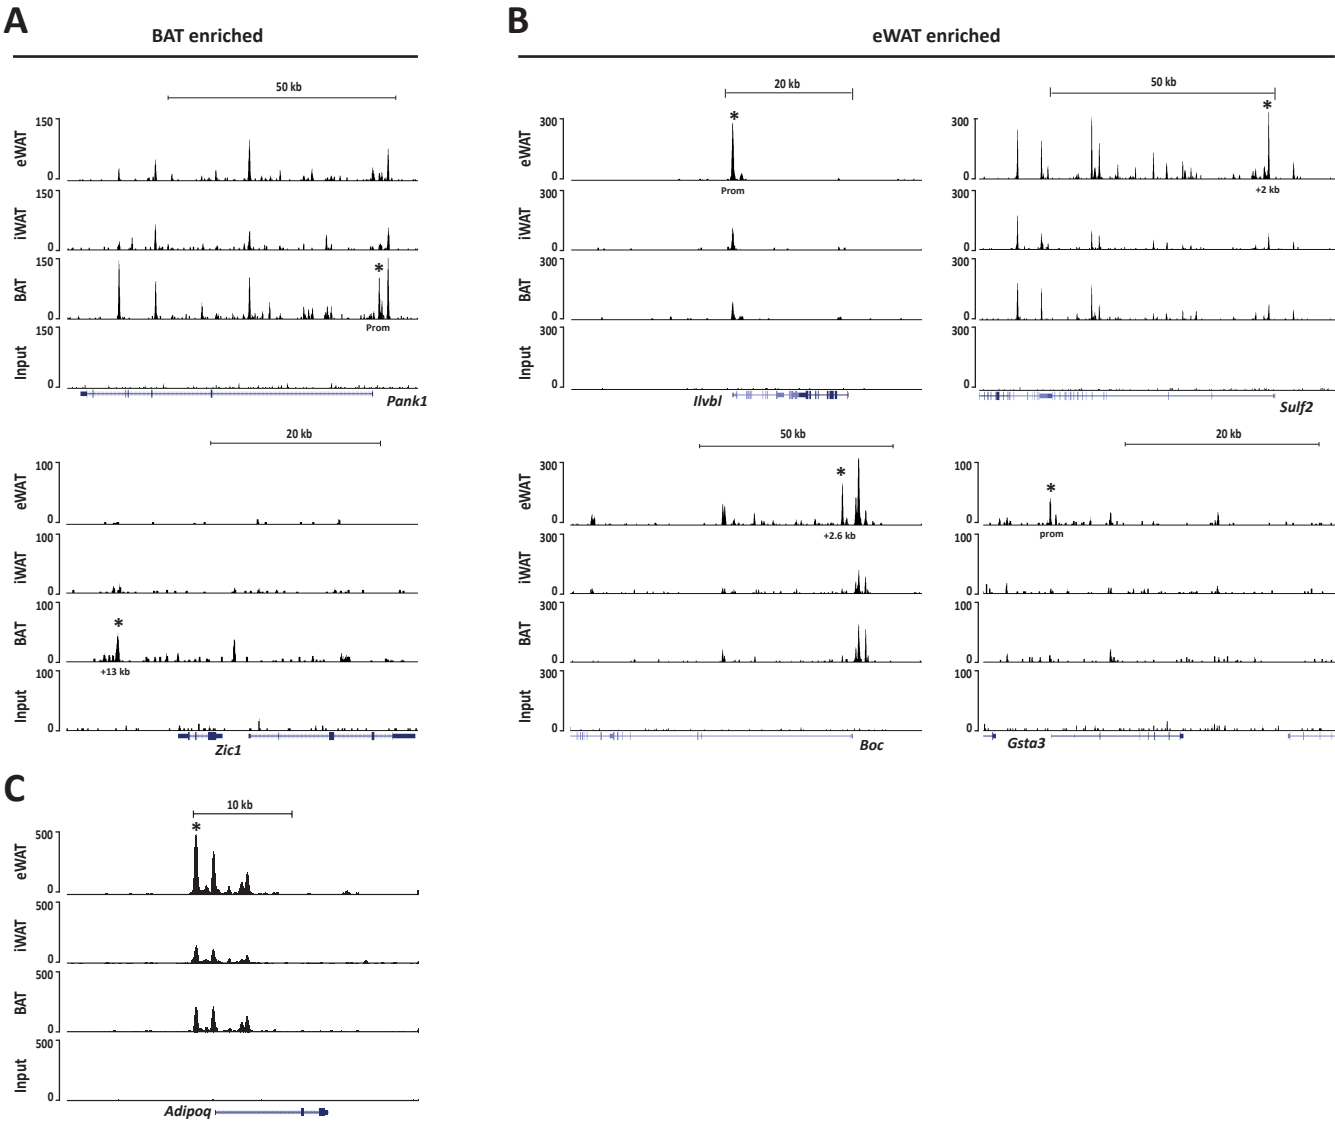

**Figure S3. PPAR $\gamma$  binding at selected loci with eWAT- or BAT-selective binding**

PPAR $\gamma$  binding to selected loci that display depot-selective binding of PPAR $\gamma$  enriched in BAT- (A) and eWAT-derived adipocytes (B). (C) PPAR $\gamma$  binding in the *Adipoq* locus. UCSC Genome Browser tracks of PPAR $\gamma$  binding in eWAT-, iWAT-, and BAT-derived adipocytes are shown. Sites investigated in Fig. 5 and Fig. 6 are marked by an asterisk (\*).
